# Supplementary material
Source: publisher figshare collection journal article supplement (https://acs.figshare.com/ndownloader/files/33962916)
Supplement: Supplementary file 1 [file 33962916]

## Supporting Information

### Multifaceted Interaction Studies between Carbon Dots and Proteins of Clinical Importance for Optical Sensing Signals

Smita Das, Roshika Kaushik, Pranab Goswami\*

Department of Biosciences and Bioengineering, Indian Institute of Technology Guwahati, Guwahati-781039, Assam, India. \*Correspondence: Fax: +91 361 2582249; Tel: +91 361 2582202; E-mail: pgoswami@iitg.ac.in (P. Goswami).

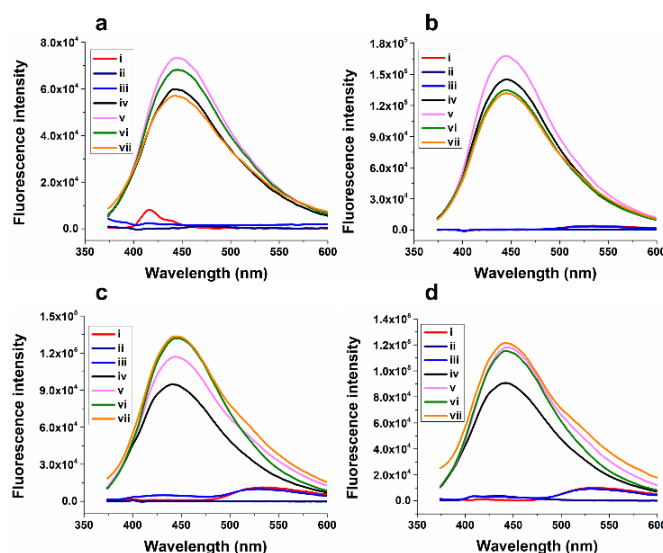

**Fig. S1:** (a) Fluorescence change of different reaction systems at the CD excitation wavelength ( $\lambda_{354}$  nm): (i) ChOx, (ii) Chol, (iii) ChOx+Chol, (iv) CD, (v) CD+ChOx (after 5 minutes), (vi) CD+Chol, (vii) CD+ChOx+Chol. (b) (i) GOx, (ii) GL, (iii) GOx+GL, (iv) CD, (v) CD+GOx (after 5 minutes), (vi) CD+GL, (vii) CD+GOx+GL. (c) (i) AOx, (ii) MeOH, (iii) AOx+MeOH, (iv) CD, (v) CD+AOx (after 5 minutes), (vi) CD+MeOH, (vii) CD+AOx+MeOH. (d) (i) AOx, (ii) EtOH, (iii) AOx+EtOH, (iv) CD, (v) CD+AOx (after 5 minutes), (vi) CD+EtOH, (vii) CD+AOx+EtOH.

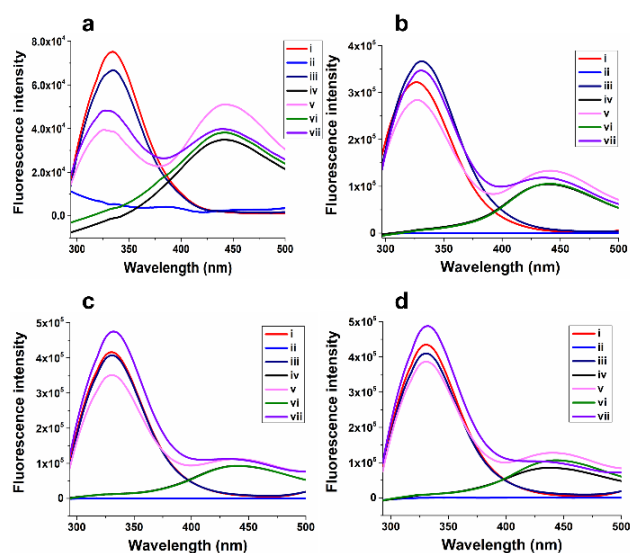

**Fig. S2:** (a) Fluorescence change of different reaction systems at the ChOx excitation wavelength ( $\lambda_{274}$  nm): (i) ChOx, (ii) Chol, (iii) ChOx+Chol, (iv) CD, (v) CD+ChOx (after 5 minutes), (vi) CD+Chol, (vii) CD+ChOx+Chol. (b) Fluorescence change of different reaction systems at the GOx excitation wavelength ( $\lambda_{274}$  nm): (i) GOx, (ii) GL, (iii) GOx+GL, (iv) CD, (v) CD+GOx (after 5 minutes), (vi) CD+GL, (vii) CD+GOx+GL. (c) Fluorescence change of different reaction systems at the AOx excitation wavelength ( $\lambda_{274}$  nm): (i) AOx, (ii) MeOH, (iii) AOx+MeOH, (iv) CD, (v) CD+AOx (after 5 minutes), (vi) CD+MeOH, (vii) CD+AOx+MeOH. (d) Fluorescence change of different reaction systems at the AOx excitation wavelength ( $\lambda_{274}$  nm): (i) AOx, (ii) EtOH, (iii) AOx+EtOH, (iv) CD, (v) CD+AOx (after 5 minutes), (vi) CD+EtOH, (vii) CD+AOx+EtOH.

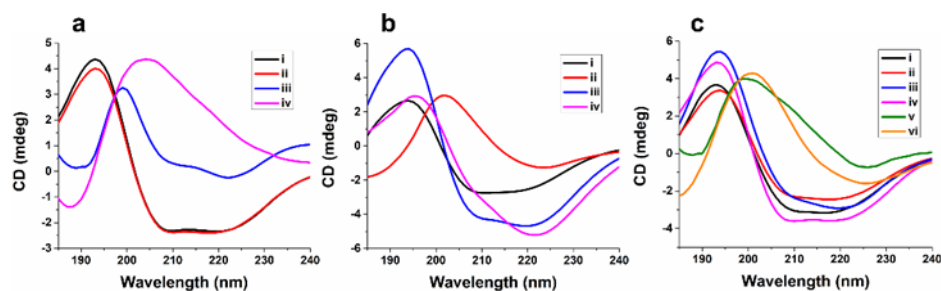

**Fig. S3.** (a) Circular dichroism spectra of (i) ChOx, (ii) ChOx+CD, (iii) ChOx+Chol, (iv) ChOx+Chol+CD, (b) Circular dichroism spectra of (i) GOx, (ii) GOx+CD, (iii) GOx+GL, (iv) GOx+GL+CD. (c) Circular dichroism spectra of (i) AOx, (ii) AOx+CD, (iii) AOx+EtOH, (iv) AOx+MeOH, (v) AOx+EtOH+CD, (vi) AOx+MeOH+CD.

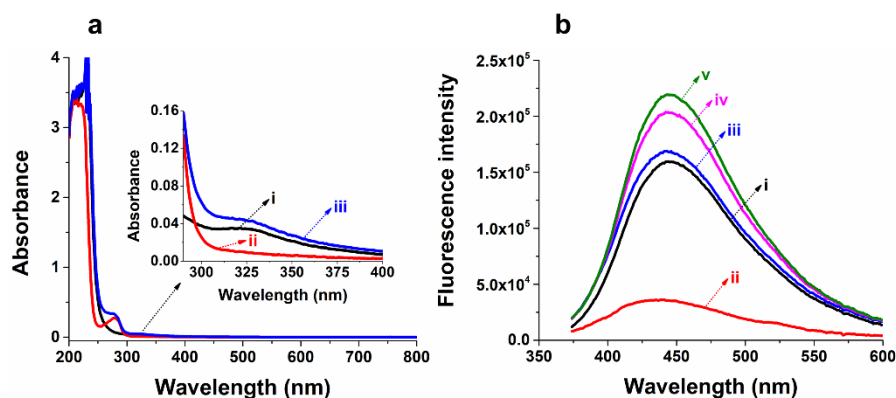

**Fig. S4.** (a) Absorbance of different reaction systems: (i) CD, (ii) HSA, and (iii) CD+HSA, (b) Fluorescence emission (i) CD, (ii) HSA, and CD+HSA at (iii) 2 mins, (iv) 6 mins, and (v) 10 mins at excitation of CD (at  $\lambda_{ex}$  354 nm) (Inset: Fluorescence intensity of CD+HSA at different time intervals. Experiment was carried out using 50  $\mu$ L of stock 10.3 mg/mL HSA and 10  $\mu$ L of stock CD solution (100 mg/mL).

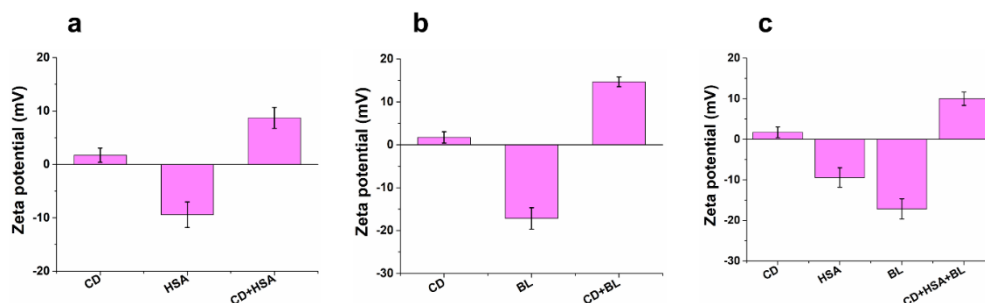

**Fig. S5.** Zeta potential of (a) CD, HSA, and CD+HSA, (b) CD, BL (Bilirubin), and CD+BL, and (c) CD, HSA, BL, and CD+HSA+BL. The concentration of CD (1 mg/mL), HSA (0.52 mg/mL), and BL (2  $\mu$ M) used in the reaction mixture are shown in the bracket.

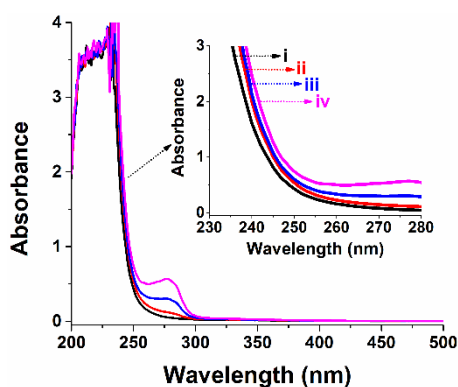

**Fig. S6.** UV-vis spectra of CD and increasing concentrations of HSA. (i) CD, (ii) CD+103  $\mu$ g/mL HSA, (iii) CD+515  $\mu$ g/mL HSA, (iv) CD+1.03 mg/mL HSA. The concentration of CD used in the experiment is 1 mg/mL.

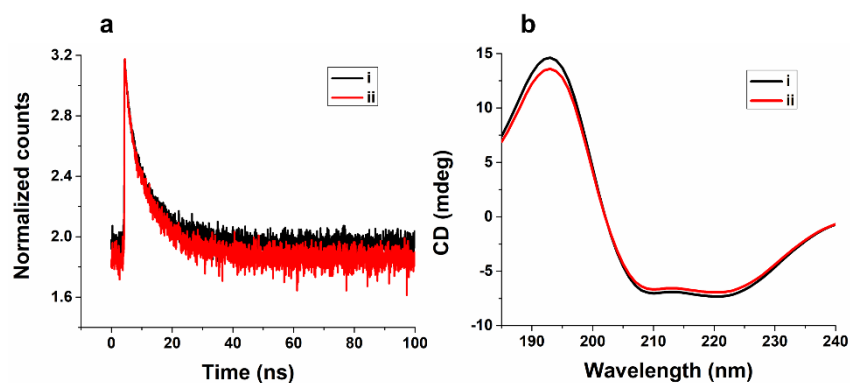

**Fig. S7.** (a) Time resolved fluorescence spectra of (i) CD, and (ii) CD+HSA, (b) Circular Dichroism spectra of (i) HSA, (ii) CD+HSA.

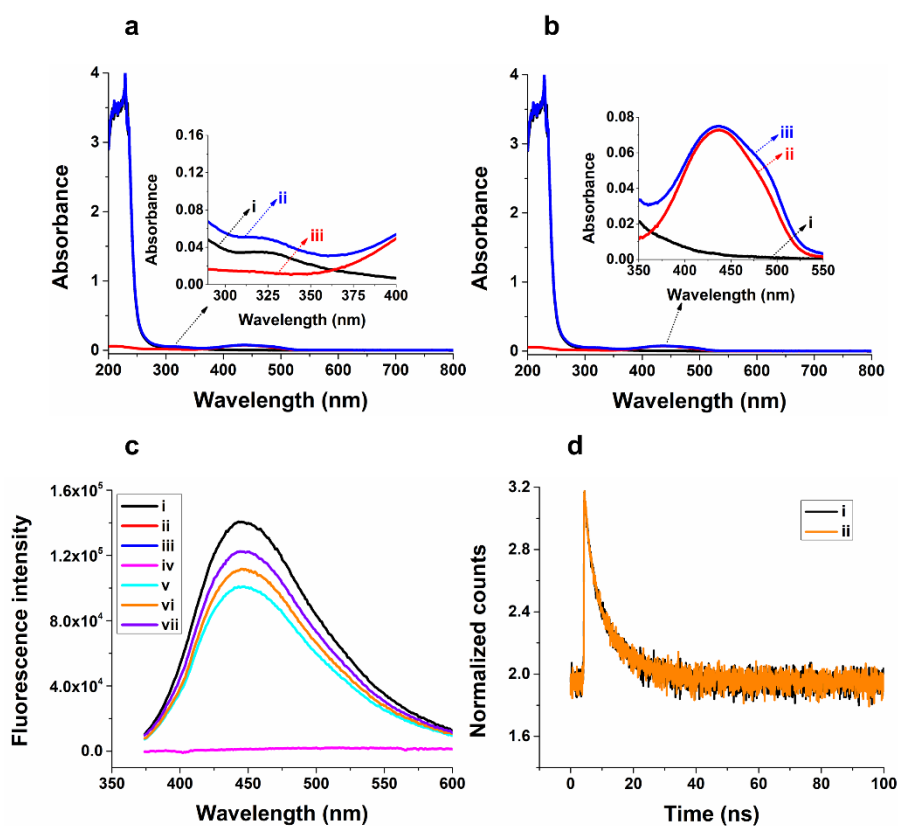

**Fig. S8.** (a) Effect of BL on absorbance of CD. (i) CD, (ii) BL, and (iii) CD+BL, (b) Effect of CD on the absorbance of BL. (i) CD, (ii) BL, (iii) CD+BL, (c) Fluorescence of (i) CD, (ii) 0.02  $\mu\text{M}$  BL, (iii) 0.3  $\mu\text{M}$  BL, (iv) 2.43  $\mu\text{M}$  BL, (v) CD+0.02  $\mu\text{M}$  BL, (vi) CD+0.3  $\mu\text{M}$  BL, (vii) CD+2.43  $\mu\text{M}$  BL, (d) Time resolved fluorescence spectra of (i) CD, and (ii) CD+BL. The concentration of CD used in the experiment is 1 mg/mL.

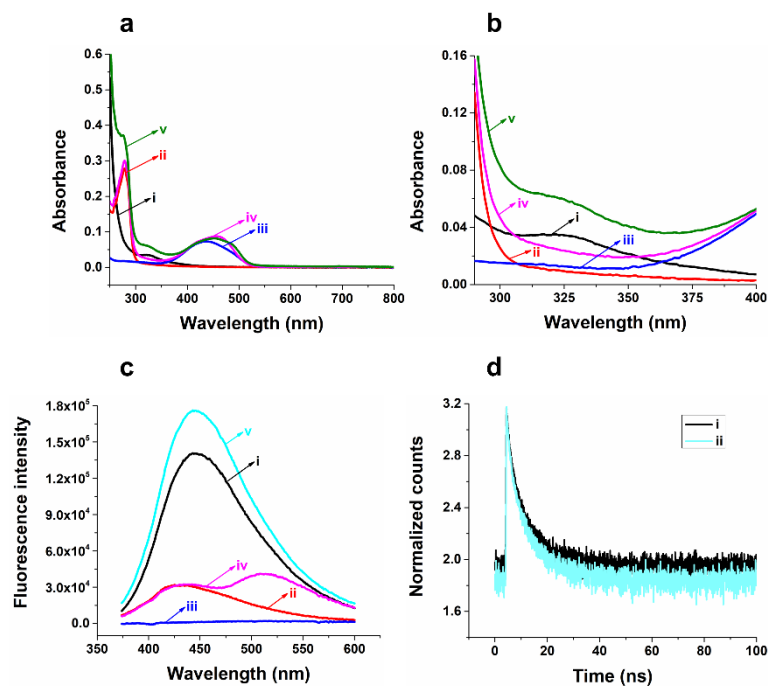

**Fig. S9.** (a) Effect of CD on the absorbance of HSA+BL. (i) CD, (ii) HSA, (iii) BL, (iv) HSA+BL, (v) CD+HSA+BL, (b) Effect of HSA+BL on the absorbance of CD. (i) CD, (ii) HSA, (iii) BL, (iv) HSA+BL, (v) CD+HSA+BL, (c) Effect of HSA+BL on the fluorescence of CD (CD excitation wavelength: 354 nm). (i) CD, (ii) HSA, (iii) BL, (iv) HSA+BL, (v) CD+HSA+BL, (d) Time resolved fluorescence spectra of (i) CD, and (ii) CD+HSA+BL. Experiment was carried out using 50  $\mu$ L of stock 10.3 mg/mL HSA, 10  $\mu$ L of stock CD solution (100 mg/mL), and 20  $\mu$ L of stock 100  $\mu$ M bilirubin.

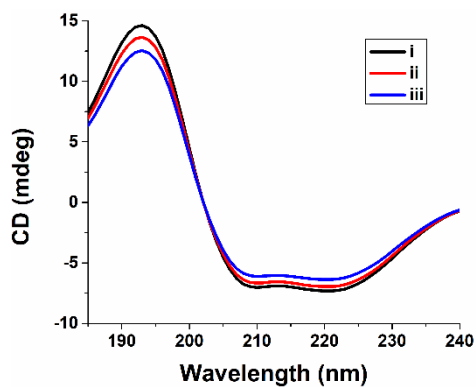

**Fig. S10.** Circular Dichroism spectra of (i) HSA, (ii) HSA+BL, (iii) HSA+BL+CD.

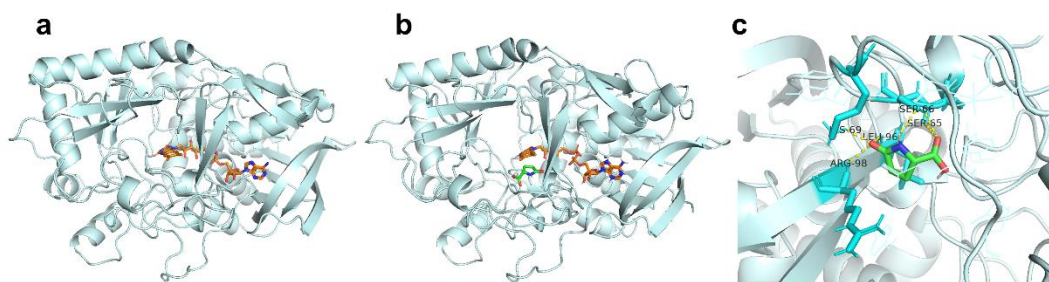

**Fig. S11.** (a) Crystallographic structure of ChOx with the FAD (orange), (b) Best binding pose for PGA (green) with ChOx; (c) Amino acid residues in ChOx that form hydrogen bond with PGA.

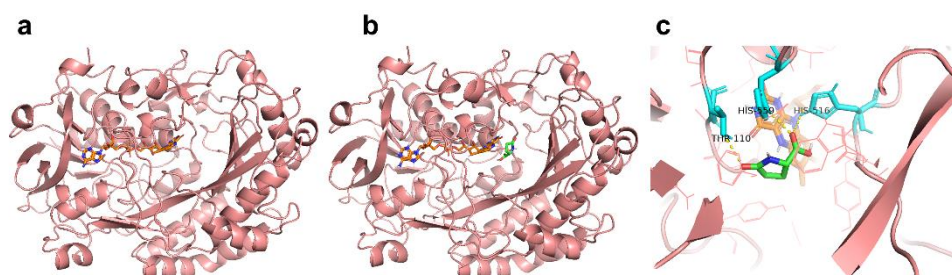

**Fig. S12.** (a) Crystallographic structure of GOx with the FAD (orange), (b) Best binding pose for PGA (green) with GOx; (c) Amino acid residues in GOx that form hydrogen bond with PGA.

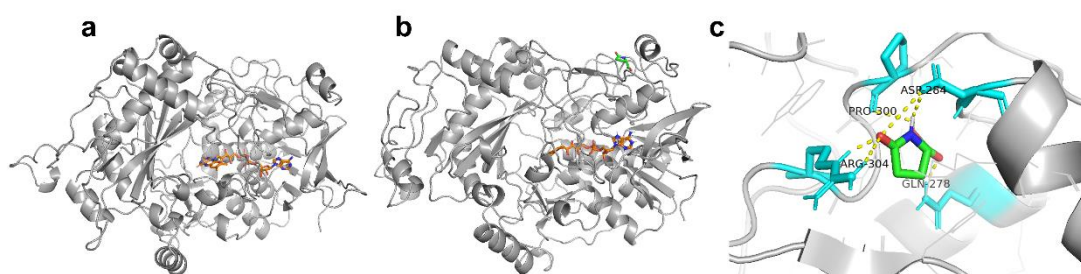

**Fig. S13.** (a) Crystallographic structure of AOx with the FAD (orange), (b) Best binding pose for PGA (green) with AOx; (c) Amino acid residues in AOx that form hydrogen bond with PGA.

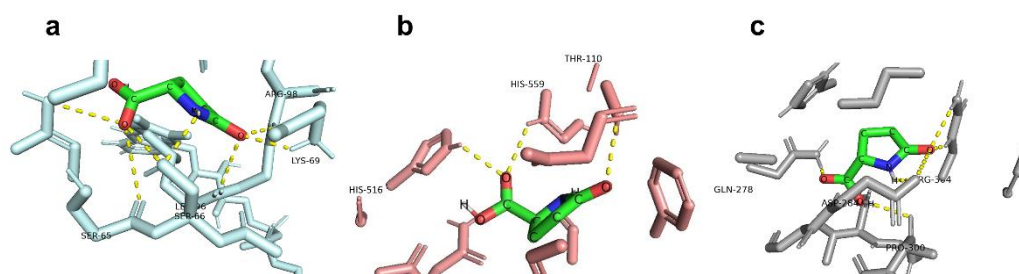

**Fig. S14.** Different functional groups of PGA involved in the binding with amino acids of (a) ChOx, (b) GOx, and (c) AOx.

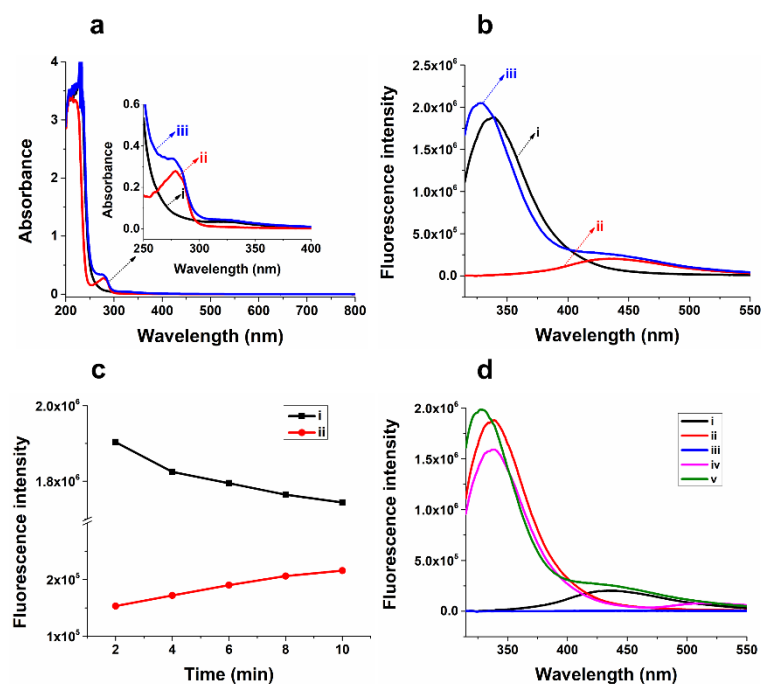

**Fig. S15.** (a) Absorbance of different reaction systems: (i) CD, (ii) HSA, and (iii) CD+HSA, (b) Fluorescence of (i) HSA, (ii) CD, and (iii) CD+HSA (after 5 minutes) at the HSA excitation wavelength ( $\lambda_{\text{ex}}$  295 nm), (c) Fluorescence change of (i) HSA and (ii) CD at different incubation time at HSA excitation wavelength ( $\lambda_{\text{ex}}$  295 nm), (d) Effect of CD on the fluorescence of HSA+BL (HSA excitation wavelength: 295 nm) . (i) CD, (ii) HSA, (iii) BL, (iv) HSA+BL, (v) CD+HSA+BL. Experiment was carried out using 50  $\mu\text{L}$  of stock 10.3 mg/mL HSA and 10  $\mu\text{L}$  of stock CD solution (100 mg/mL).

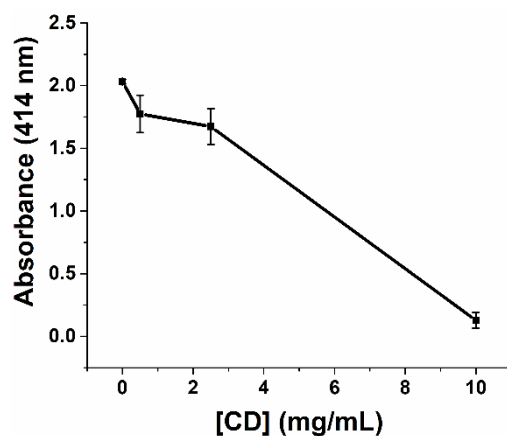

**Fig. S16.** Influence of interaction of CD on the catalytic activity of GOx. Experiment was performed using different concentrations (0 mg/mL, 1 mg/mL, 2.5 mg/mL, and 10 mg/mL) of stock 100 mg/mL CD solution, 10  $\mu\text{L}$  of 1 mg/mL stock GOx, 10 mM GL, and 5 mM ABTS.

**Table S1.** The content of different secondary structures of HSA in the absence and presence of CD

| Reaction system | Helix (%) | $\beta$ strand (%) | Turns (%) | Unordered (%) |
|-----------------|-----------|--------------------|-----------|---------------|
| HSA             | 48.1      | 10.2               | 17.2      | 25.1          |
| HSA+CD          | 48.0      | 11.4               | 17.8      | 25            |

**Table S2.** The content of different secondary structures of HSA in different reaction systems

| Reaction system | Helix (%) | $\beta$ strand (%) | Turns (%) | Unordered (%) |
|-----------------|-----------|--------------------|-----------|---------------|
| HSA             | 48.1      | 10.2               | 17.2      | 25.1          |
| HSA+BL          | 47.7      | 12.9               | 17.5      | 25.1          |
| HSA+CD+BL       | 45.1      | 13.7               | 19.7      | 26.4          |

**Table S3.** Binding of the different functional groups of the PGA to the amino acid residues of the enzymes

| Functional groups | ChOx                 | GOx            | AOx            |
|-------------------|----------------------|----------------|----------------|
| -C=O              | LYS69, LEU96, ARG98  | THR110         | ARG304, ASP284 |
| -COOH             | SER65, SER66, 219TYR | HIS516, HIS559 | GLN278, PRO300 |
| -NH               | SER66                |                | ASP284         |

**Table S4.** Binding site of the substrates with their respective enzyme

| Enzyme                     | Substrate   | Interacting amino acids (hydrophobic bond)                                                                          | Interacting amino acids (hydrogen bond) |
|----------------------------|-------------|---------------------------------------------------------------------------------------------------------------------|-----------------------------------------|
| <b>Cholesterol oxidase</b> | Cholesterol | 70ASN, 71ARG, 72THR, 73GLU, 74ALA, 75PRO, 76LEU, 78SER, 79PHE, 86ASN, 98ARG, 107TYR, 432LEU, 433PHE, 434GLY         | 77GLY                                   |
| <b>Glucose oxidase</b>     | Glucose     | 80TYR, 94ILE, 95ARG, 103SER, 289ALA, 290GLY, 293VAL, 294SER, 328ASP, 450TYR, 515TYR, 516HIS, 518VAL, 548ASP, 550SER | 96SER, 291SER, 292ALA, 517GLY, 549GLY   |
| <b>Alcohol oxidase</b>     | Methanol    | 6LYS, 87ALA, 269GLY, 270THR, 271ILE, 568LYS                                                                         | -                                       |
